# Supplementary material for: Missing value imputation for microarray gene expression data using histone acetylation information
Source: PubMed Central journal article supplement (PMC2432074; doi:10.1186/1471-2105-9-252), 2008-05-29

Sp.elutriation

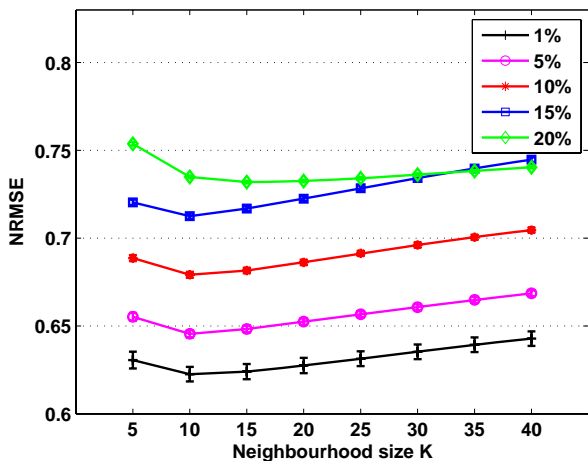

Sp.alpha

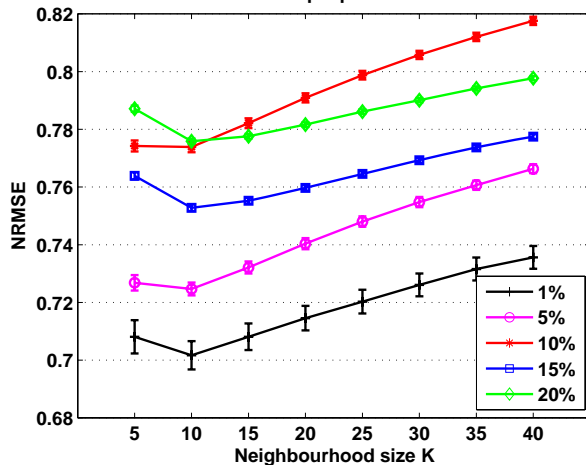

Diauxic

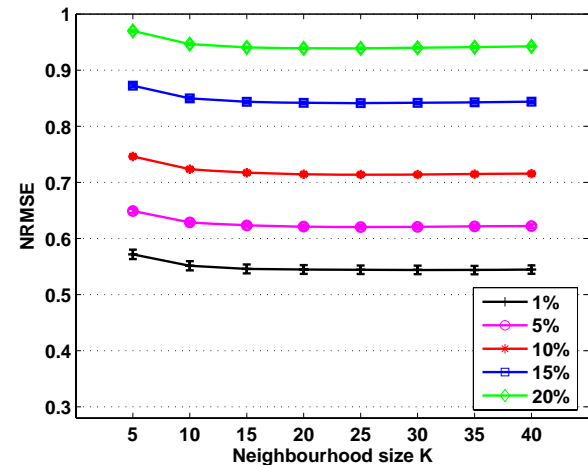

Gasch

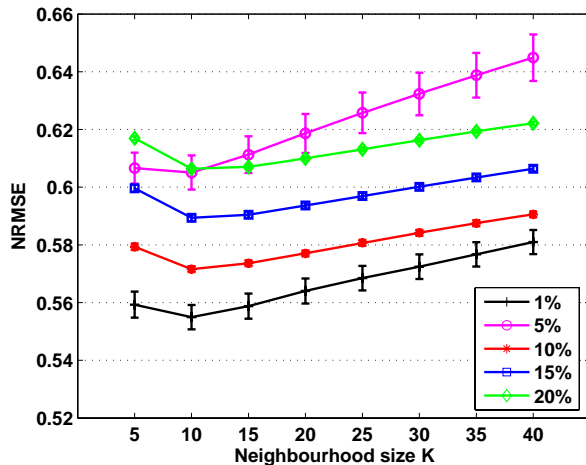

Histone

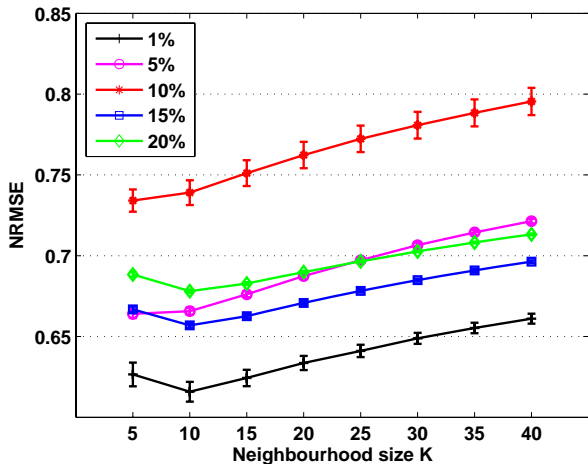

Calcineurin

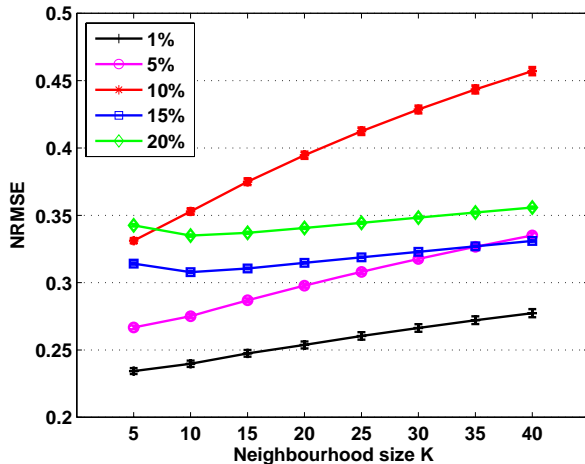

Supplement: 1471-2105-9-252-S1.pdf [file 1471-2105-9-252-S1.pdf]
