# Supplementary material for: Missing value imputation for microarray gene expression data using histone acetylation information
Source: PubMed Central journal article supplement (PMC2432074; doi:10.1186/1471-2105-9-252), 2008-05-29

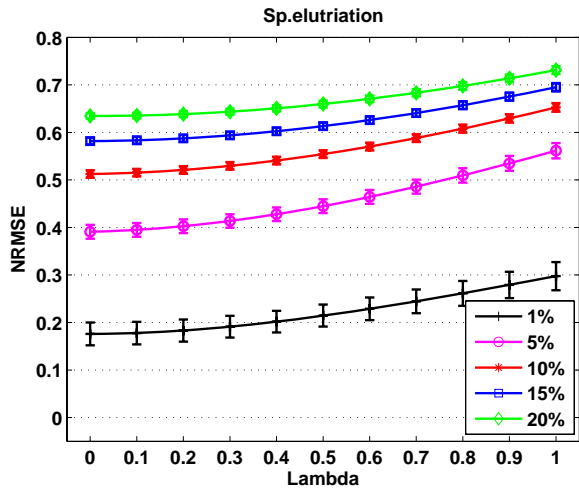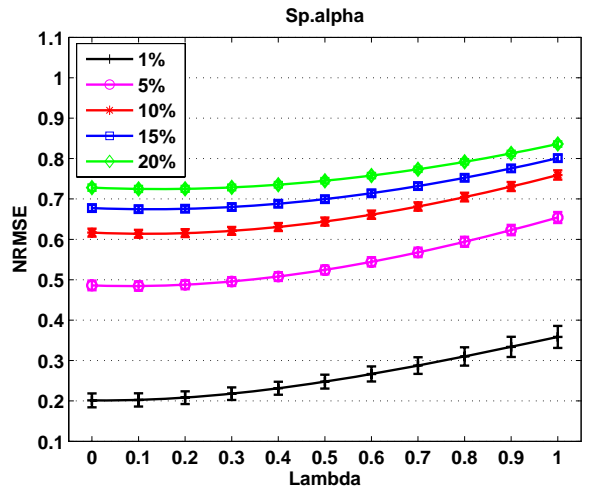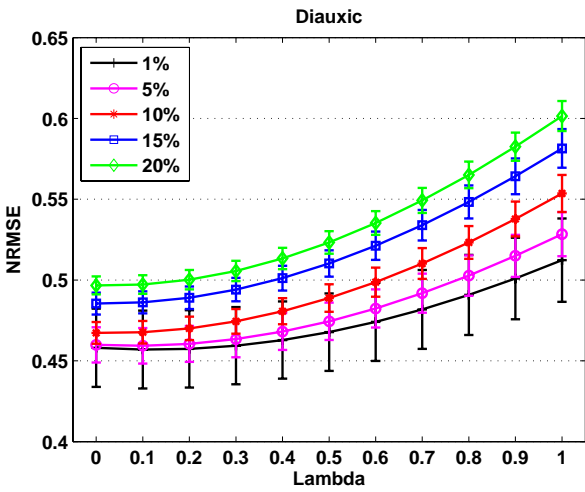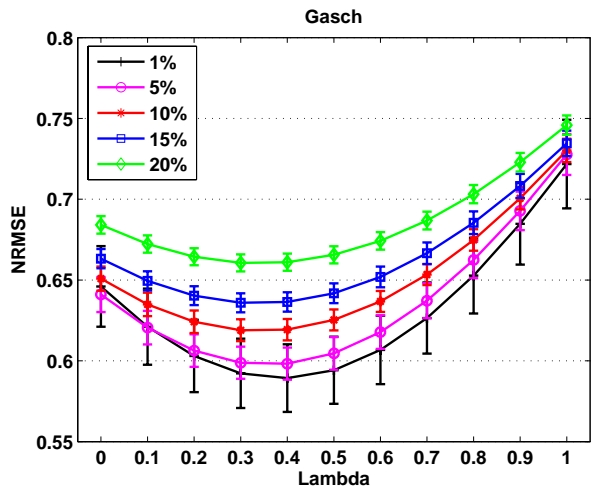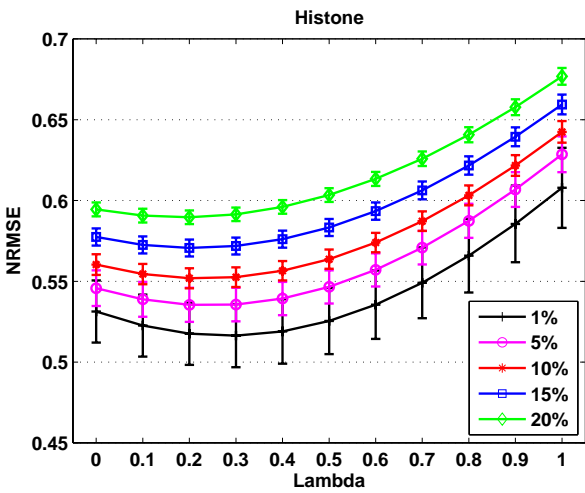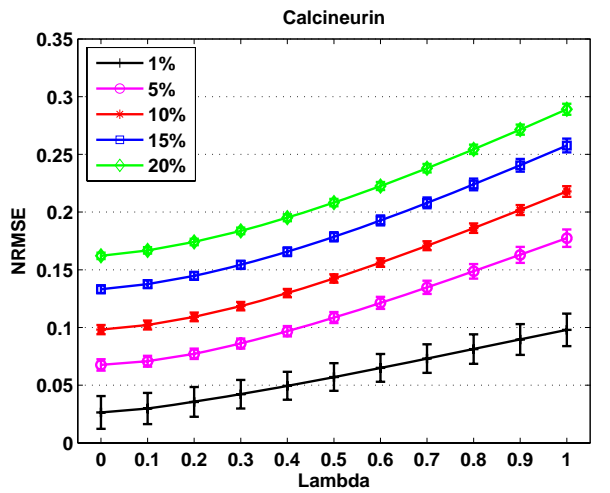

Supplement: 1471-2105-9-252-S4.pdf [file 1471-2105-9-252-S4.pdf]
